# Supplementary figures and images for: Early Defense Mechanisms of Brassica oleracea in Response to Attack by Xanthomonas campestris pv. campestris
Source: MDPI journal article supplement (doi:10.3390/plants10122705), 2021-12-09

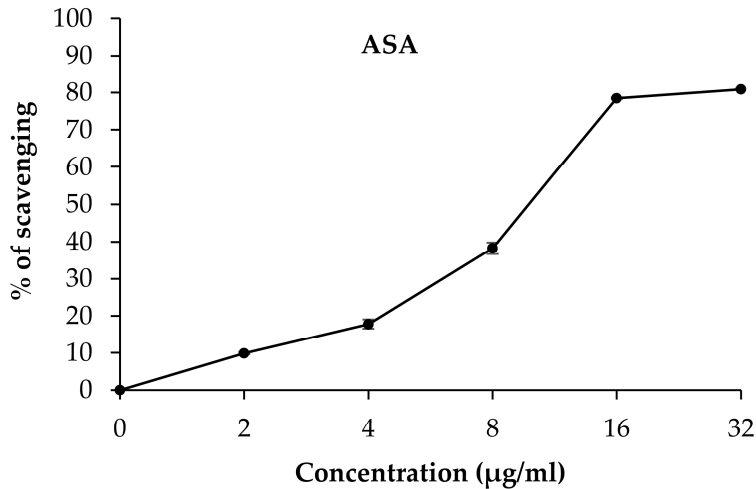

**Figure S2.** DPPH free radical scavenging activity of ascorbic acid (AsA).

Supplement: s1 [file s1]
